# Supplementary material for: Impact of bacteriocin-producing strains on bacterial community composition in a simplified human intestinal microbiota
Source: PubMed Central journal article supplement (PMC10748383; doi:10.3389/fmicb.2023.1290697), 2023-12-08
Supplement: Data_Sheet_1.pdf [file Data_Sheet_1.pdf]

## Supplementary Material

### Supplementary Tables

**Supplementary Table 1.** Genome size (bp) of SIHUMI member strains and *L. lactis* MG1363. The mass of each genome was calculated multiplying the genome size by  $1.096 \times 10^{-12}$  (average Molecular Weight of 1 bp in ng).

| Strain                       | Genome size (bp) | Genome Mass (ng)      |
|------------------------------|------------------|-----------------------|
| <i>E. faecalis</i> OG1RF     | 2739625          | $3.00 \times 10^{-6}$ |
| <i>E. coli</i> LF82          | 4773108          | $3.00 \times 10^{-6}$ |
| <i>R. gnavus</i> ATCC 29149  | 3549191          | $3.89 \times 10^{-6}$ |
| <i>F. prausnitzii</i> A2-165 | 3102523          | $3.40 \times 10^{-6}$ |
| <i>P. vulgatus</i> DSM1447   | 4773108          | $5.23 \times 10^{-6}$ |
| <i>B. longum</i> ATCC15707   | 2385164          | $2.61 \times 10^{-6}$ |
| <i>L. plantarum</i> WCFS1    | 3308274          | $3.63 \times 10^{-6}$ |
| <i>L. lactis</i> MG1363      | 2529478          | $2.77 \times 10^{-6}$ |

### Supplementary Figures

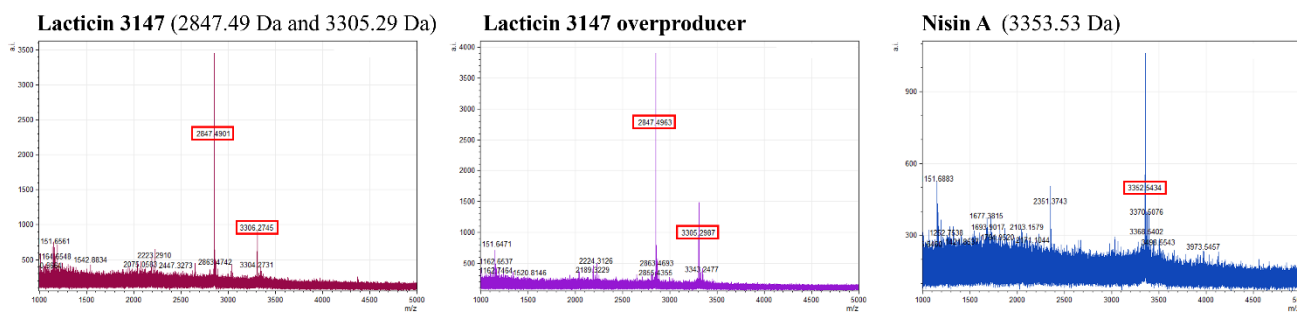

**Supplementary Figure 1.** Colony Mass Spectrometry results of the lantibiotic-producing strains. Each graph indicates the bacteriocin and the predicted mass in brackets. The measured mass in Daltons is highlighted in red. The peaks corresponding to each bacteriocin were absent in the isogenic non-producing (Bac-) strains (data not shown).

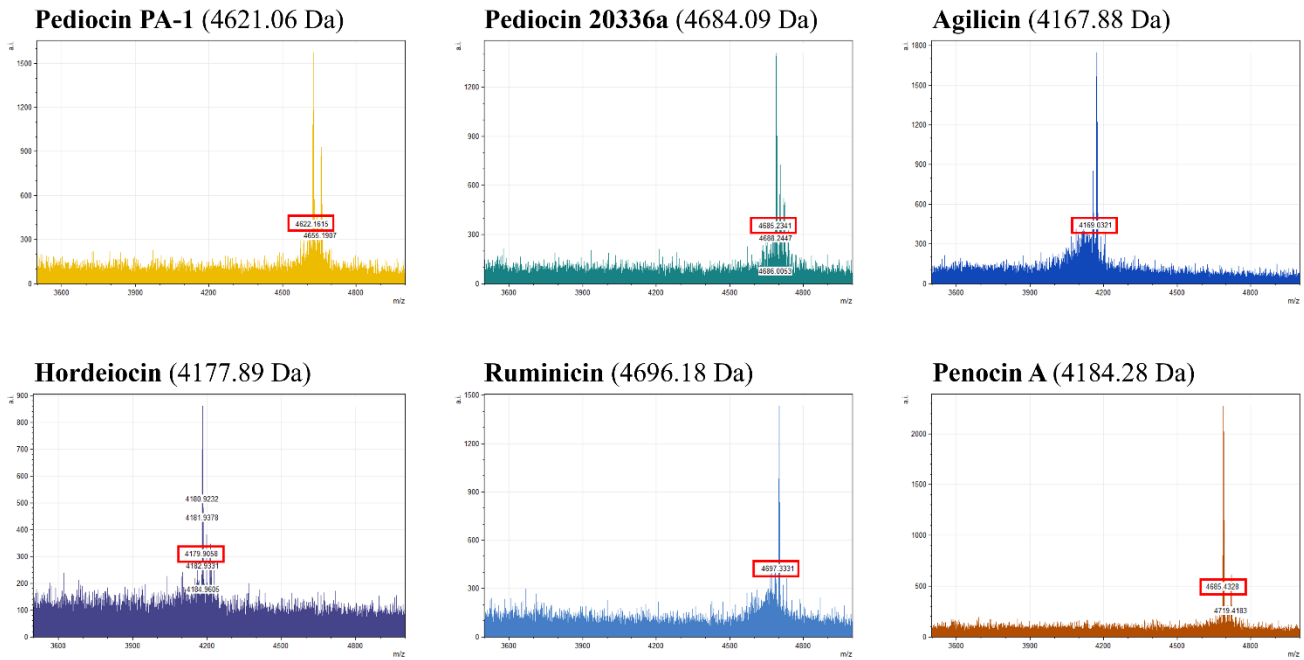

**Supplementary Figure 2.** Mass Spectrometry results of cell-free supernatants of the pediocin-producing strains after a two-step purification procedure. Each graph indicates the bacteriocin and the predicted mass in brackets. Predicted masses were adjusted for the presence of disulphide bonds. The measured mass in Daltons is highlighted in red. The peaks corresponding to each bacteriocin were absent in the isogenic non-producing (Bac-) strain (data not shown).

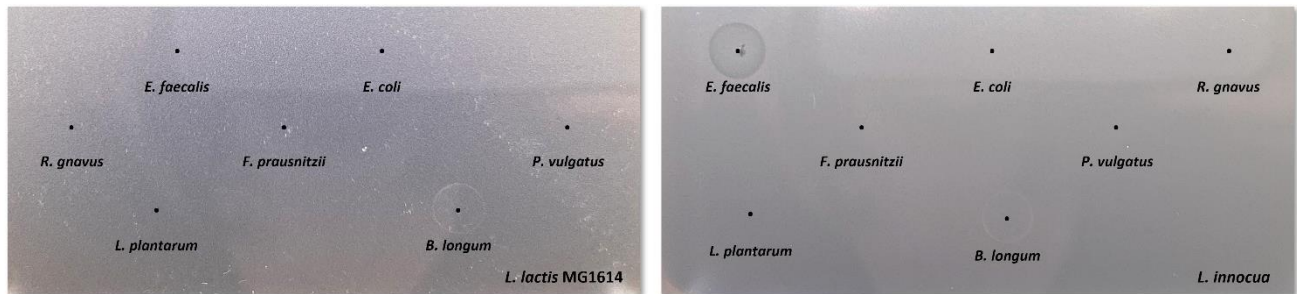

**Supplementary Figure 3.** Antimicrobial activity of culture supernatants from SIHUMI strains by agar spot diffusion method against the indicator organism *L. lactis* MG1614 (left) and *L. innocua* (Right). The black dots indicate where each supernatant was spotted.

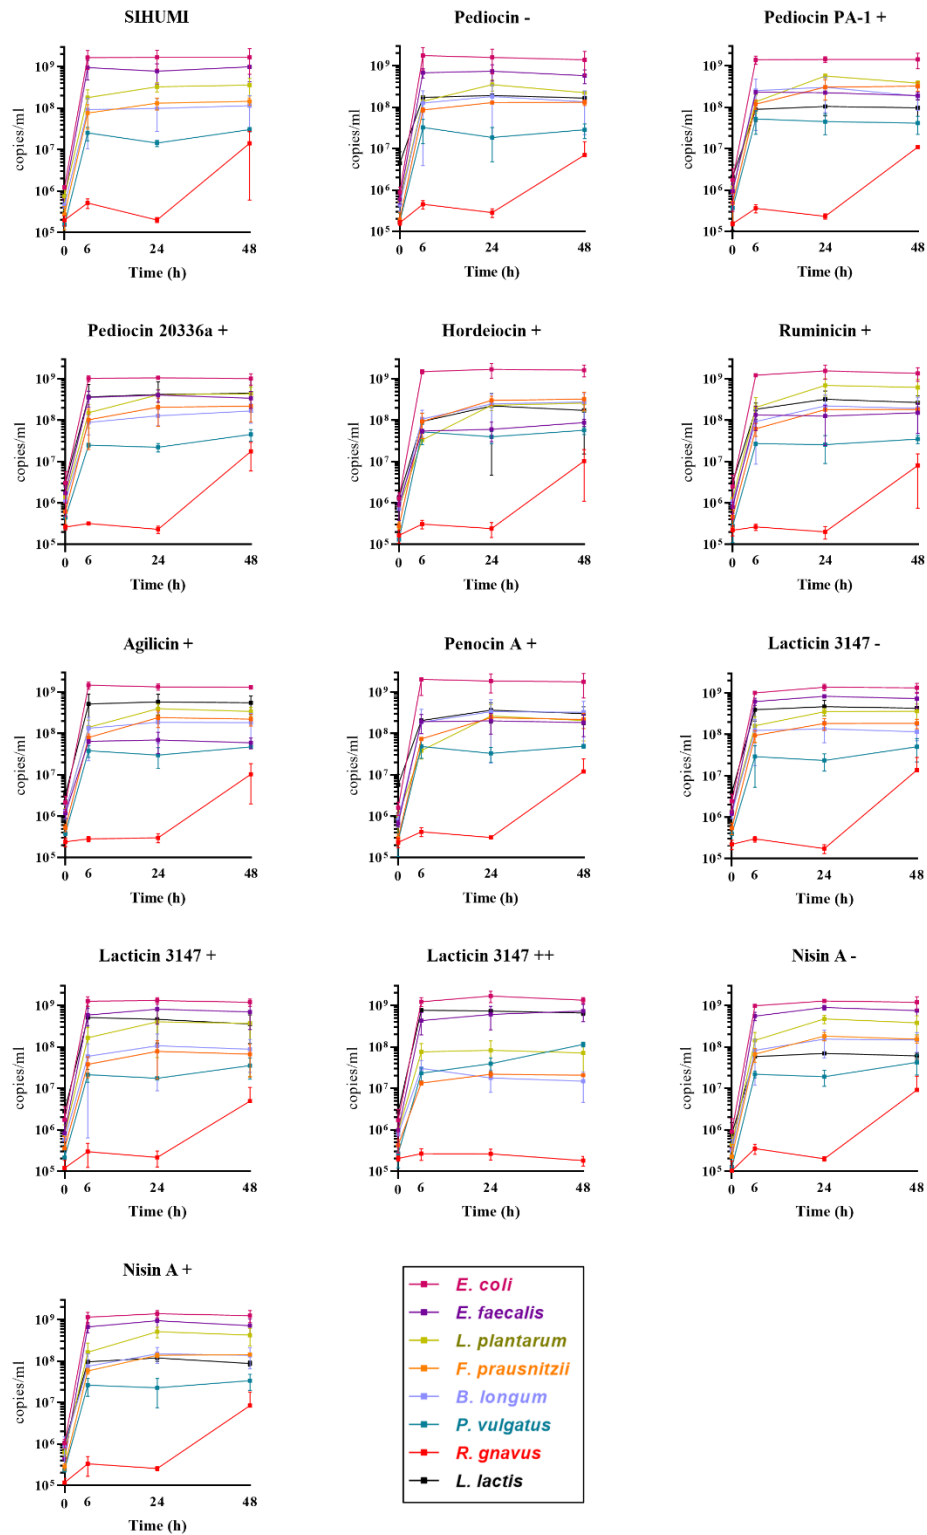

**Supplementary Figure 4.** Genome copies/ml over time (0, 6, 24 and 48 h) of members of SIHUMI consortium in LYHBHI after inoculation with Bac<sup>+</sup> and Bac<sup>-</sup> *L. lactis* strains at time 0. Each graph indicates the bacteriocin produced. Each time point is represented as a mean with standard deviation of 4 replicates.

| Producer         | 0h | 6h | 24h | 48h |
|------------------|----|----|-----|-----|
| No strain        |    |    |     |     |
| Pediocin-        |    |    |     |     |
| Pediocin PA1+    |    |    |     |     |
| Pediocin 20336a+ |    |    |     |     |
| Ruminicin+       |    |    |     |     |
| Hordeiocin+      |    |    |     |     |
| Agilicin+        |    |    |     |     |
| Penocin A+       |    |    |     |     |

*L. innocua*

| Producer                       | 0h | 6h | 24h | 48h |
|--------------------------------|----|----|-----|-----|
| No strain                      |    |    |     |     |
| Lacticin 3147-                 |    |    |     |     |
| Lacticin 3147+                 |    |    |     |     |
| Lacticin 3147++ (overproducer) |    |    |     |     |
| Nisin A-                       |    |    |     |     |
| Nisin A+                       |    |    |     |     |

*L. lactis* MG1614

**Supplementary Figure 5.** Spot assays of SIHUMI culture supernatants at different time points (0, 6, 24 and 48 h) against *L. innocua* (for pediocin-like bacteriocins) and *L. lactis* MG1614 (for lantibiotics).
